# Supplementary material for: Cellular and Cytokine Responses to Salmonella enterica Serotype Typhi Proteins in Patients with Typhoid Fever in Bangladesh
Source: PubMed Central journal article supplement (PMC4047724; doi:10.4269/ajtmh.13-0261), 2014-06-04
Supplement: SD1.pdf [file SD1.pdf]

SUPPLEMENTAL TABLE 1  
Cytokine responses in acute and convalescent samples of typhoid fever patients

|                | Mean acute | SEM     | Mean convalescent | SEM     | Relative change | P value |
|----------------|------------|---------|-------------------|---------|-----------------|---------|
| EGF            | 17.25      | 11.32   | 23.11             | 23.11   | 1.34            | 0.4067  |
| Eotaxin        | 0.71       | 0.71    | 5.52              | 1.86    | 7.77            | 0.0154  |
| FGF-2          | 0.00       | 0.00    | 4.15              | 3.36    | 4.15            | 0.2716  |
| Flt-3 Ligand   | 4.81       | 4.40    | 6.32              | 3.50    | 1.32            | 0.2907  |
| Fractalkin     | 4.79       | 4.79    | 59.70             | 30.44   | 12.45           | 0.0101  |
| G-CSF          | 1226.19    | 578.58  | 2738.51           | 2074.23 | 2.23            | 0.4311  |
| GM-CSF         | 494.68     | 180.66  | 819.55            | 182.97  | 1.66            | 0.2235  |
| GRO            | 0.00       | 0.00    | OOOR >            |         |                 |         |
| IFN $\alpha$ 2 | 3.49       | 3.49    | 2.33              | 1.36    | 0.67            | 0.4964  |
| IFN $\gamma$   | 572.82     | 392.51  | 5482.00           | 2941.18 | 9.57            | 0.0492  |
| IL1A           | 265.99     | 124.33  | 395.55            | 84.18   | 1.49            | 0.1957  |
| IL1B           | 263.05     | 73.69   | 788.21            | 164.85  | 3.00            | 0.0851  |
| IL1Ra          | 0.00       | 0.00    | 21.67             | 21.00   | 21.67           | 0.1913  |
| IL-2           | 3.26       | 1.71    | 17.28             | 8.65    | 5.30            | 0.0935  |
| IL-3           | ND         |         | ND                |         |                 |         |
| IL-4           | 6.28       | 6.28    | 9.72              | 3.97    | 1.55            | 0.2513  |
| IL-5           | 2.79       | 2.10    | 58.32             | 41.57   | 20.88           | 0.0562  |
| IL-6           | 1884.40    | 1212.60 | 8079.68           | 3013.30 | 4.29            | 0.1613  |
| IL-7           | 16.36      | 8.40    | 56.25             | 17.43   | 3.44            | 0.1571  |
| IL-8           | OOOR >     |         | OOOR >            |         |                 |         |
| IL-9           | 1.06       | 1.06    | 31.34             | 10.22   | 29.56           | 0.0065  |
| IL-10          | 53.53      | 38.80   | 150.40            | 29.30   | 2.81            | 0.1206  |
| IL12 (p40)     | 47.04      | 35.88   | 89.02             | 16.76   | 1.89            | 0.1277  |
| IL12 (p70)     | 3.52       | 1.44    | 8.50              | 1.67    | 2.41            | 0.1215  |
| IL-13          | 17.54      | 8.37    | 198.76            | 96.51   | 11.33           | 0.0104  |
| IL-15          | 0.42       | 0.42    | 3.95              | 0.75    | 9.48            | 0.0130  |
| IL-17          | 4.81       | 4.81    | 5.71              | 3.12    | 1.19            | 0.2051  |
| IP 10          | 112.81     | 53.99   | 516.92            | 155.47  | 4.58            | 0.1057  |
| MCP-1          | 0.00       | 0.00    | 0.00              | 0.00    |                 |         |
| MCP-3          | 0.00       | 0.00    | 279.68            | 279.68  | 279.68          | 0.2113  |
| MDC            | 0.00       | 0.00    | 0.00              | 0.00    |                 |         |
| MIP-1 $\alpha$ | OOOR >     |         | OOOR >            |         |                 |         |
| MIP-1 $\beta$  | 79.66      | 53.68   | 2202.62           | 556.99  | 27.65           | 0.0417  |
| sCD40L         | 6.26       | 6.26    | 99.96             | 31.87   | 15.96           | 0.0354  |
| sIL-2Ra        | 5.03       | 3.28    | 67.88             | 25.71   | 13.49           | 0.0561  |
| TGF $\alpha$   | 0.00       | 0.00    | 3.80              | 2.20    | 3.80            | 0.1005  |
| TNF $\alpha$   | 910.43     | 500.57  | 978.84            | 210.93  | 1.08            | 0.2625  |
| TNF $\beta$    | 0.82       | 0.82    | 27.90             | 14.31   | 34.16           | 0.0366  |
| VEGF           | 9.10       | 9.10    | 48.53             | 19.94   | 5.33            | 0.0718  |

ND = not detected; OOR > = out of range high.
